# Supplementary material for: Effect of High-intensity Interval Training on patients with Type 2 Diabetes Mellitus: An Overview of Systematic Reviews
Source: Research Square preprint supplement (doi:10.21203/rs.3.rs-457587/v1), 2021-06-17
Supplement: Supplementary file 1 [file 00009557d69ace10d874bb21.docx]

Table S4 Evaluation results of AMSTAR2 tools

| Author (year) | 1 | 2 | 3 | 4 | 5 | 6 | 7 | 8 | 9 | 10 | 11 | 12 | 13 | 14 | 15 | 16 | Quality rating |
| --- | --- | --- | --- | --- | --- | --- | --- | --- | --- | --- | --- | --- | --- | --- | --- | --- | --- |
| LORA-POZO 2019 | Y | Y | N | N | Y | Y | N | Y | Y | N | Y | Y | N | Y | N | Y | Very low |
| DA SILVA  DE 2019 | Y | N | N | Y | Y | Y | N | Y | Y | N | N | N | N | N | N | N | Very low |
| LIU J-X 2019 | Y | N | N | Y | Y | Y | N | Y | Y | N | Y | N | N | N | N | Y | Very low |
| CHEN B-L 2018 | Y | PY | N | Y | Y | Y | N | Y | Y | N | Y | N | N | Y | N | N | Very low |
| DE NARDI  AT 2018 | Y | Y | N | Y | Y | Y | N | Y | Y | N | Y | Y | Y | Y | N | Y | Very low |
| CURRY M  2015 | Y | N | N | N | Y | N | Y | Y | Y | N | N | N | N | Y | N | N | Very low |

Note: Y is Yes, PY is Partial Yes, N is No.
